# Supplementary material for: Oxidation of CO on a carbon-based material composed of nickel hydroxide and hydroxyl graphene oxide, (Ni4(OH)3–hGO) – a first-principles calculation
Source: Royal Society of Chemistry journal article supplement (doi:10.1039/c5cp00212e), 2015-01-01
Supplement: c5cp00212e1.pdf [file c5cp00212e1.pdf]

**Supporting Information: Oxidation of CO on a Carbon-based  
Material Composed of Nickel Hydroxide on Hydroxyl Graphene  
Oxide, (Ni<sub>4</sub>(OH)<sub>3</sub>/hGO) — a First-Principles Calculation**

Chen-Hao Yeh and Jia-Jen Ho\*

Department of Chemistry, National Taiwan Normal University

No. 88, Section 4, Tingchow Road, Taipei 116, Taiwan

\* Corresponding author E-mail: [jjh@ntnu.edu.tw](mailto:jjh@ntnu.edu.tw)

Phone: (886)-2-77346223

Fax: (886)-2-29324249

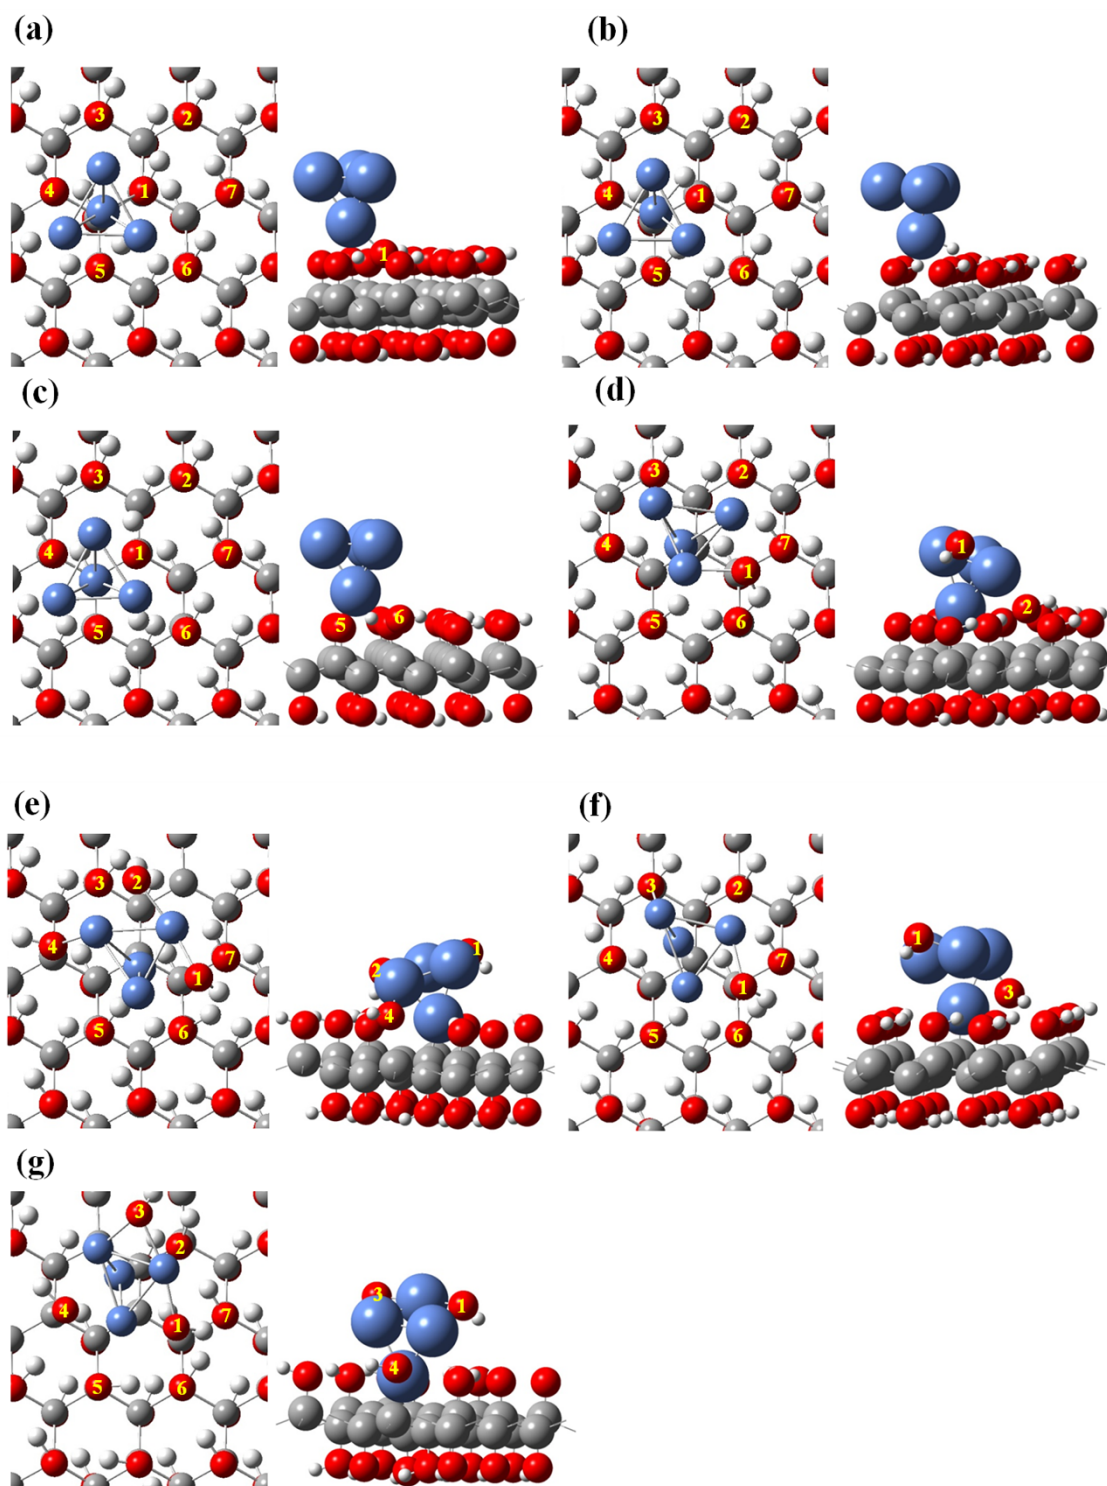

Figure S1. Transition state structures of the reduced mechanism by  $\text{Ni}_4$  on hydroxyl graphene oxide (hGO) sheet : (a)  $\text{Ni}_4\text{OH}_{(a)} + \text{hGO}_{(s)}$ , (b)  $\text{Ni}_4\text{H}_{(a)} + \text{hGO}_{(s)}$ , (c)  $\text{Ni}_{4(a)} + \text{H}_2\text{O}_{(a)} + \text{hGO}_{(s)}$ , (d)  $\text{Ni}_4(\text{OH})_{2(a)} + \text{hGO}_{(s)}$  (slight distortion), (e)  $\text{Ni}_4(\text{OH})_{3(a)} + \text{hGO}_{(s)}$  (slight distortion), (f)  $\text{Ni}_4(\text{OH})_{2(a)} + \text{hGO}_{(s)}$  (large distortion) and (g)  $\text{Ni}_4(\text{OH})_{3(a)} + \text{hGO}_{(s)}$ .

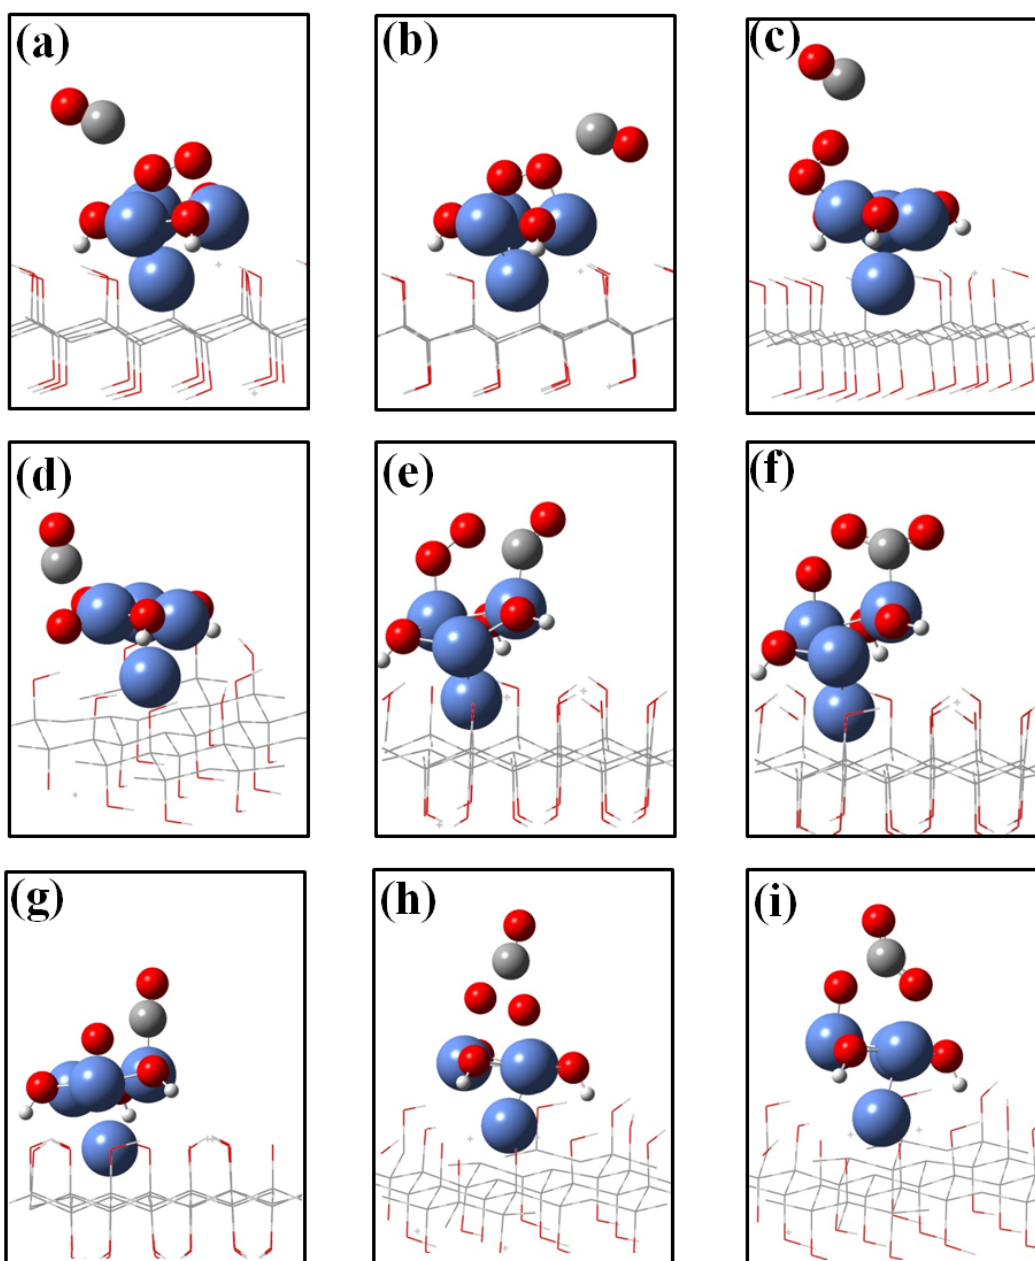

Figure S2. Transition state structures of the CO oxidation reaction on  $\text{Ni}_4(\text{OH})_3/\text{hGO}$  sheet : (a)  $\text{CO}_{(\text{g})} + \text{O}_{2(\text{a})}$  [hollow](left)  $\rightarrow \text{CO}_{2(\text{g})} + \text{O}_{(\text{a})}$ , and (b)  $\text{CO}_{(\text{g})} + \text{O}_{2(\text{a})}$  [hollow](right)  $\rightarrow \text{CO}_{2(\text{g})} + \text{O}_{(\text{a})}$ , (c)  $\text{CO}_{(\text{g})} + \text{O}_{2(\text{a})}$  [top]  $\rightarrow \text{CO}_{2(\text{g})} + \text{O}_{(\text{a})}$ , (d)  $2^{\text{nd}} \text{CO}_{(\text{g})} + \text{O}_{(\text{a})}$  [top]  $\rightarrow \text{CO}_{2(\text{g})}$ , (e)  $\text{CO}_{(\text{a})} + \text{O}_{2(\text{a})} \rightarrow \text{OCOO}_{(\text{a})}$ , (f)  $\text{OCOO}_{(\text{a})} \rightarrow \text{CO}_{2(\text{g})} + \text{O}_{(\text{a})}$ , (g)  $2^{\text{nd}} \text{CO}_{(\text{a})} + \text{O}_{(\text{a})} \rightarrow \text{CO}_{2(\text{g})}$  (h)  $\text{CO}_{(\text{g})} + \text{O}_{2(\text{a})}$  [hollow]  $\rightarrow \text{CO}_{3(\text{g})}$ , (i)  $\text{CO}_{3(\text{g})} \rightarrow \text{CO}_{2(\text{g})} + \text{O}_{(\text{a})}$ .

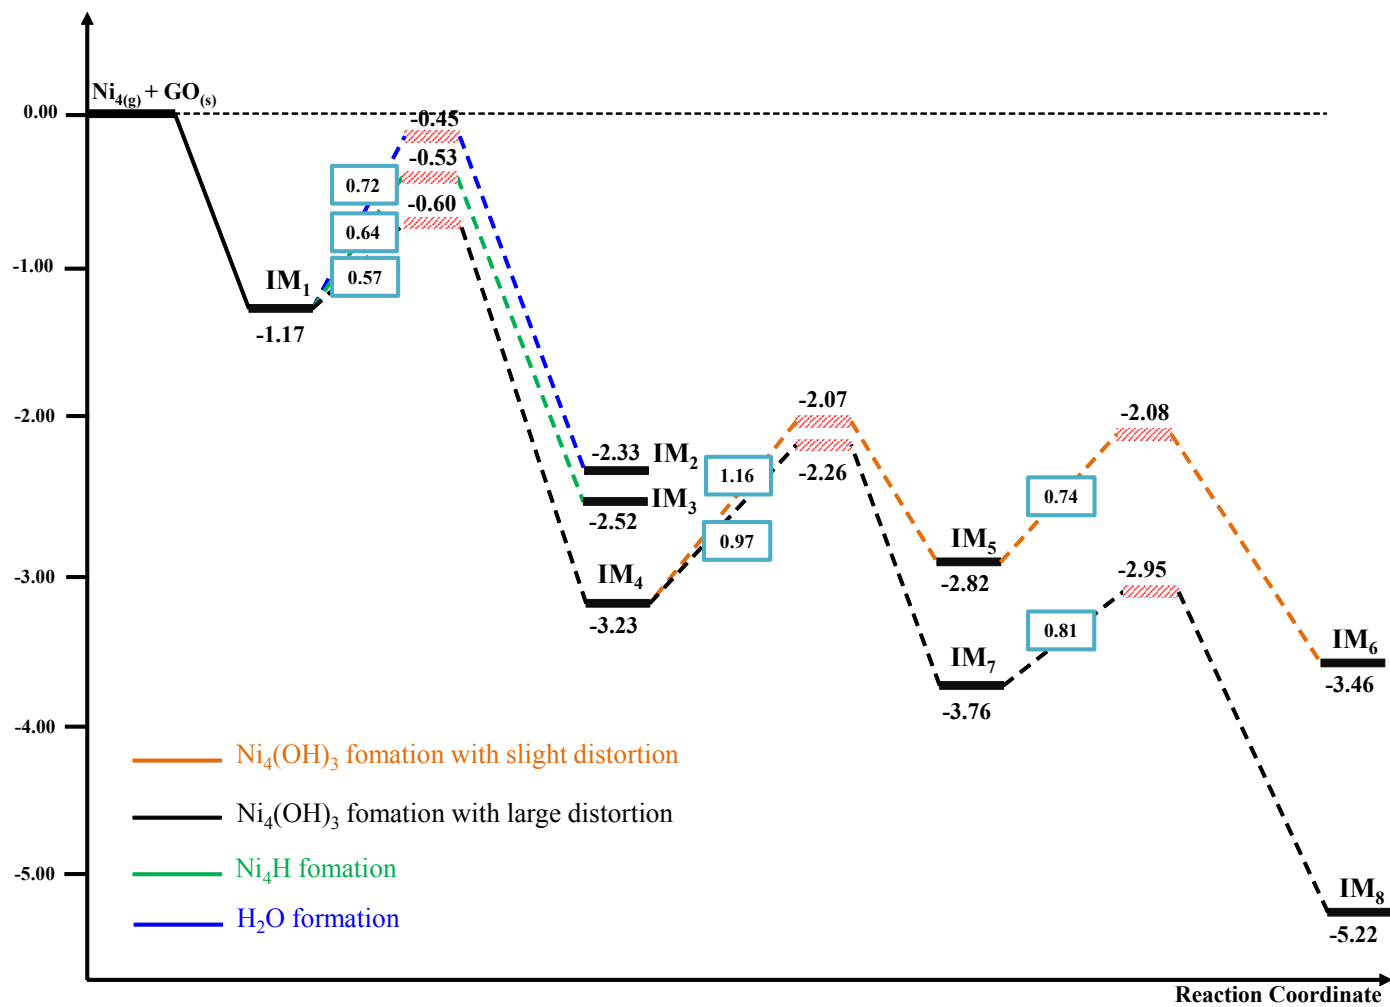

Figure S3. Calculated potential-energy diagram with DFT-D3 correction for the reaction  $\text{Ni}_4/\text{hGO} \rightarrow \text{Ni}_4(\text{OH})_3/\text{hGO}$ .

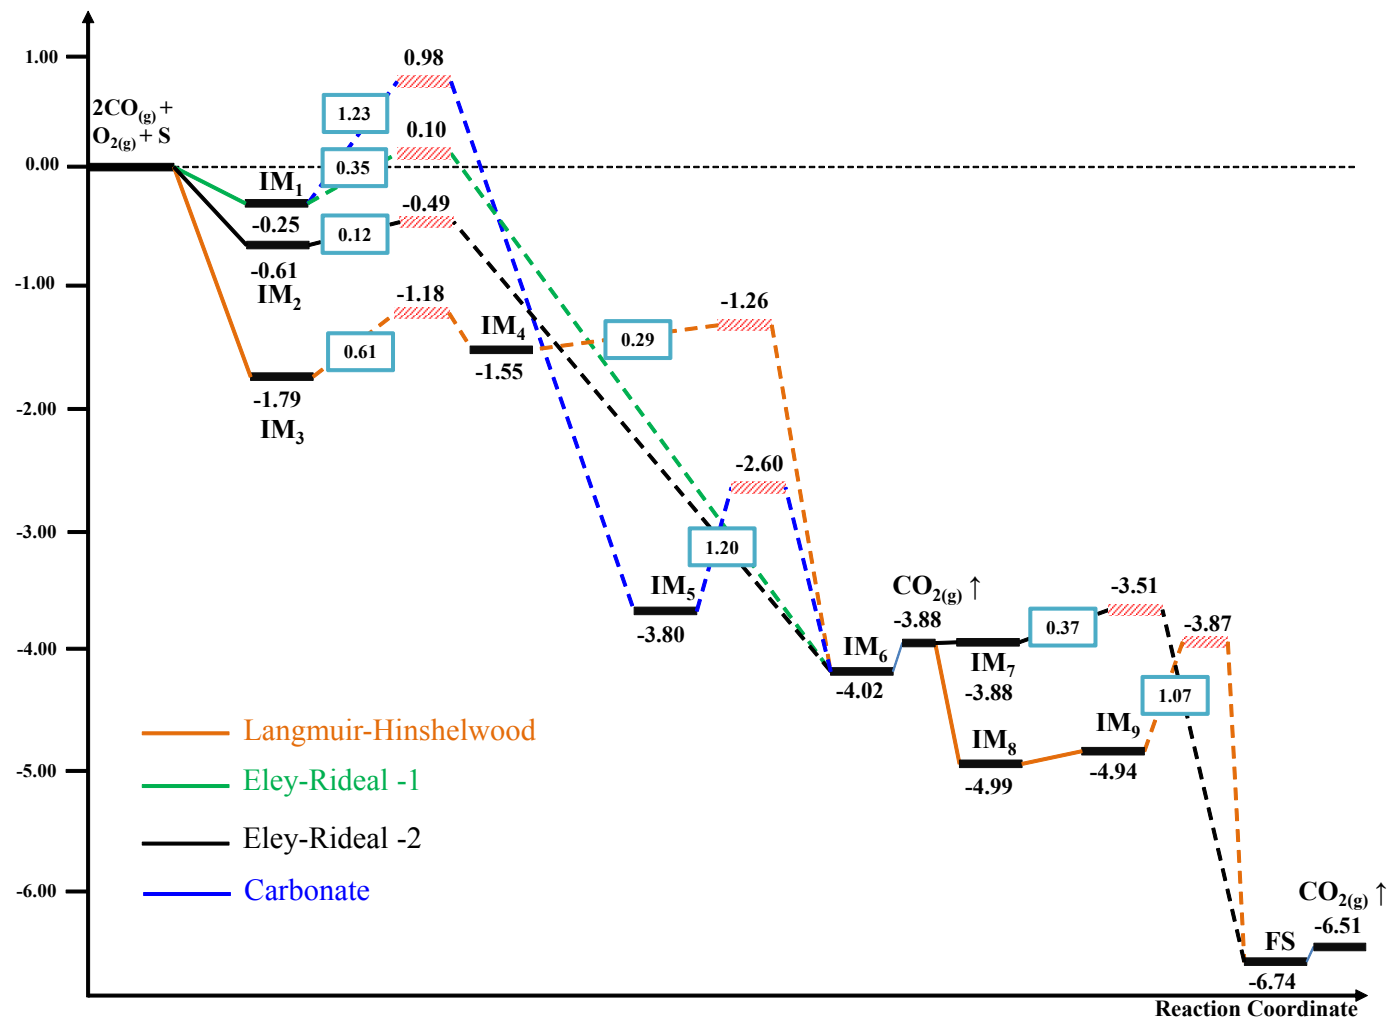

Figure S4. The calculated possible potential energy diagram with DFT-D3 correction for CO oxidation reaction on Ni<sub>4</sub>(OH)<sub>3</sub>/hGO sheet.
